# Supplementary material
Source: bioRxiv or medRxiv preprint supplement (https://www.medrxiv.org/highwire/filestream/68810/field_highwire_adjunct_files/0/19004671-1.pdf)
Supplement: Supplementary file [file 19004671-1.pdf]

**Supplementary Table 1. SNPs included in each polygenic risk score**

| SNP        | Chr | Position    | Gene           | BMI-increasing allele | Effect size ( $\beta$ coefficient per effect allele, SD units of BMI) | Included in 69-SNP risk score | Included in 91-SNP risk score | Reason for exclusion <sup>1,2</sup>        |
|------------|-----|-------------|----------------|-----------------------|-----------------------------------------------------------------------|-------------------------------|-------------------------------|--------------------------------------------|
| rs1558902  | 16  | 52,361,075  | <i>FTO</i>     | A                     | 0.0818                                                                | Yes                           | Yes                           |                                            |
| rs17024393 | 1   | 109,956,211 | <i>GNAT2</i>   | C                     | 0.0658                                                                | Yes                           | Yes                           |                                            |
| rs13021737 | 2   | 622,348     | <i>TMEM18</i>  | G                     | 0.0601                                                                | Yes                           | Yes                           |                                            |
| rs6567160  | 18  | 55,980,115  | <i>MC4R</i>    | C                     | 0.0556                                                                | Yes                           | Yes                           |                                            |
| rs11847697 | 14  | 29,584,863  | <i>PRKD1</i>   | T                     | 0.0492                                                                | Yes                           | Yes                           |                                            |
| rs16851483 | 3   | 142,758,126 | <i>RASA2</i>   | T                     | 0.0483                                                                | Yes                           | Yes                           |                                            |
| rs543874   | 1   | 176,156,103 | <i>SEC16B</i>  | G                     | 0.0482                                                                | Yes                           | Yes                           |                                            |
| rs13107325 | 4   | 103,407,732 | <i>SLC39A8</i> | T                     | 0.0477                                                                | No                            | No                            | Possible pleiotropy                        |
| rs1516725  | 3   | 187,306,698 | <i>ETV5</i>    | C                     | 0.0451                                                                | Yes                           | Yes                           |                                            |
| rs2207139  | 6   | 50,953,449  | <i>TFAP2B</i>  | G                     | 0.0447                                                                | Yes                           | Yes                           |                                            |
| rs11030104 | 11  | 27,641,093  | <i>BDNF</i>    | A                     | 0.0414                                                                | No                            | No                            | Possible pleiotropy                        |
| rs12446632 | 16  | 19,842,890  | <i>GPRC5B</i>  | G                     | 0.0403                                                                | Yes                           | Yes                           |                                            |
| rs10938397 | 4   | 44,877,284  | <i>GNPDA2</i>  | G                     | 0.0402                                                                | Yes                           | Yes                           |                                            |
| rs7899106  | 10  | 87,400,884  | <i>GRID1</i>   | G                     | 0.0395                                                                | Yes                           | Yes                           |                                            |
| rs2287019  | 19  | 50,894,012  | <i>QPCTL</i>   | C                     | 0.0360                                                                | Yes                           | Yes                           |                                            |
| rs11727676 | 4   | 145,878,514 | <i>HHIP</i>    | T                     | 0.0358                                                                | Yes                           | Yes                           |                                            |
| rs16907751 | 8   | 81,538,012  | <i>ZBTB10</i>  | C                     | 0.0350                                                                | No                            | Yes                           | Identified in secondary meta-analyses only |
| rs12429545 | 13  | 53,000,207  | <i>OLFM4</i>   | A                     | 0.0334                                                                | Yes                           | Yes                           |                                            |
| rs3101336  | 1   | 72,523,773  | <i>NEGR1</i>   | C                     | 0.0334                                                                | Yes                           | Yes                           |                                            |
| rs2245368  | 7   | 76,446,079  | <i>DTX2P1</i>  | C                     | 0.0317                                                                | Yes                           | Yes                           |                                            |
| rs7138803  | 12  | 48,533,735  | <i>BCDIN3D</i> | A                     | 0.0315                                                                | Yes                           | Yes                           |                                            |
| rs16951275 | 15  | 65,864,222  | <i>MAP2K5</i>  | T                     | 0.0311                                                                | Yes                           | Yes                           |                                            |
| rs3888190  | 16  | 28,796,987  | <i>ATP2A1</i>  | A                     | 0.0309                                                                | No                            | No                            | Possible pleiotropy                        |
| rs11191560 | 10  | 104,859,028 | <i>NT5C2</i>   | C                     | 0.0308                                                                | Yes                           | Yes                           |                                            |
| rs10182181 | 2   | 25,003,800  | <i>ADCY3</i>   | G                     | 0.0307                                                                | Yes                           | Yes                           |                                            |
| rs11057405 | 12  | 121,347,850 | <i>CLIP1</i>   | G                     | 0.0307                                                                | Yes                           | Yes                           |                                            |

| SNP        | Chr | Position    | Gene      | BMI-increasing allele | Effect size ( $\beta$ coefficient per effect allele, SD units of BMI) | Included in 69-SNP risk score | Included in 91-SNP risk score | Reason for exclusion <sup>1,2</sup>                  |
|------------|-----|-------------|-----------|-----------------------|-----------------------------------------------------------------------|-------------------------------|-------------------------------|------------------------------------------------------|
| rs17001654 | 4   | 77,348,592  | SCARB2    | G                     | 0.0306                                                                | No                            | No                            | Linkage disequilibrium                               |
| rs9581854  | 13  | 26,915,782  | MTIF3     | T                     | 0.0298                                                                | Yes                           | Yes                           |                                                      |
| rs13078960 | 3   | 85,890,280  | CADM2     | G                     | 0.0297                                                                | Yes                           | Yes                           |                                                      |
| rs3810291  | 19  | 52,260,843  | ZC3H4     | A                     | 0.0283                                                                | Yes                           | Yes                           |                                                      |
| rs13191362 | 6   | 162,953,340 | PARK2     | A                     | 0.0277                                                                | Yes                           | Yes                           |                                                      |
| rs3817334  | 11  | 47,607,569  | MTCH2     | T                     | 0.0262                                                                | Yes                           | Yes                           |                                                      |
| rs2112347  | 5   | 75,050,998  | POC5      | T                     | 0.0261                                                                | Yes                           | Yes                           |                                                      |
| rs2075650  | 19  | 50,087,459  | TOMM40    | A                     | 0.0258                                                                | No                            | No                            | Linkage disequilibrium                               |
| rs10968576 | 9   | 28,404,339  | LINGO2    | G                     | 0.0249                                                                | Yes                           | Yes                           |                                                      |
| rs17094222 | 10  | 102,385,430 | HIF1AN    | C                     | 0.0249                                                                | Yes                           | Yes                           |                                                      |
| rs2121279  | 2   | 142,759,755 | LRP1B     | T                     | 0.0245                                                                | Yes                           | Yes                           |                                                      |
| rs12566985 | 1   | 74,774,781  | FPGT      | G                     | 0.0242                                                                | Yes                           | Yes                           |                                                      |
| rs7141420  | 14  | 78,969,207  | NRXN3     | T                     | 0.0235                                                                | Yes                           | Yes                           |                                                      |
| rs7903146  | 10  | 114,748,339 | TCF7L2    | C                     | 0.0234                                                                | No                            | Yes                           | Not included in Tyrrell et al's GRS (reason unclear) |
| rs13201877 | 6   | 137,717,234 | IFNGR1    | G                     | 0.0233                                                                | No                            | Yes                           | Identified in secondary meta-analyses only           |
| rs10132280 | 14  | 24,998,019  | STXBP6    | C                     | 0.0230                                                                | Yes                           | Yes                           |                                                      |
| rs1016287  | 2   | 59,159,129  | LINC01122 | T                     | 0.0229                                                                | Yes                           | Yes                           |                                                      |
| rs657452   | 1   | 49,362,434  | AGBL4     | A                     | 0.0227                                                                | Yes                           | Yes                           |                                                      |
| rs758747   | 16  | 3,567,359   | NLRC3     | T                     | 0.0225                                                                | Yes                           | Yes                           |                                                      |
| rs17405819 | 8   | 76,969,139  | HNF4G     | T                     | 0.0224                                                                | Yes                           | Yes                           |                                                      |
| rs205262   | 6   | 34,671,142  | C6orf106  | G                     | 0.0221                                                                | Yes                           | Yes                           |                                                      |
| rs7599312  | 2   | 213,121,476 | ERBB4     | G                     | 0.0220                                                                | Yes                           | Yes                           |                                                      |
| rs11165643 | 1   | 96,696,685  | PTBP2     | T                     | 0.0218                                                                | Yes                           | Yes                           |                                                      |
| rs12286929 | 11  | 114,527,614 | CADM1     | G                     | 0.0217                                                                | Yes                           | Yes                           |                                                      |
| rs7243357  | 18  | 55,034,299  | GRP       | T                     | 0.0217                                                                | Yes                           | Yes                           |                                                      |
| rs12401738 | 1   | 78,219,349  | FUBP1     | A                     | 0.0211                                                                | Yes                           | Yes                           |                                                      |
| rs17203016 | 2   | 207,963,763 | CREB1     | G                     | 0.0210                                                                | No                            | Yes                           | Identified in secondary meta-analyses only           |

| SNP        | Chr | Position    | Gene         | BMI-increasing allele | Effect size ( $\beta$ coefficient per effect allele, SD units of BMI) | Included in 69-SNP risk score | Included in 91-SNP risk score | Reason for exclusion <sup>1,2</sup>                     |
|------------|-----|-------------|--------------|-----------------------|-----------------------------------------------------------------------|-------------------------------|-------------------------------|---------------------------------------------------------|
| rs4256980  | 11  | 8,630,515   | TRIM66       | G                     | 0.0209                                                                | Yes                           | Yes                           |                                                         |
| rs11126666 | 2   | 26,782,315  | KCNK3        | A                     | 0.0207                                                                | Yes                           | Yes                           |                                                         |
| rs12885454 | 14  | 28,806,589  | PRKD1        | C                     | 0.0207                                                                | Yes                           | Yes                           |                                                         |
| rs2650492  | 16  | 28,240,912  | SBK1         | A                     | 0.0207                                                                | Yes                           | Yes                           |                                                         |
| rs1167827  | 7   | 75,001,105  | HIP1         | G                     | 0.0202                                                                | Yes                           | Yes                           |                                                         |
| rs9914578  | 17  | 1,951,886   | SMG6         | G                     | 0.0201                                                                | No                            | Yes                           | Identified in secondary meta-analyses only              |
| rs2365389  | 3   | 61,211,502  | FHIT         | C                     | 0.0200                                                                | Yes                           | Yes                           |                                                         |
| rs2176598  | 11  | 43,820,854  | HSD17B12     | T                     | 0.0198                                                                | Yes                           | Yes                           |                                                         |
| rs1460676  | 2   | 164,275,935 | FIGN         | C                     | 0.0197                                                                | No                            | Yes                           | Identified in secondary meta-analyses only              |
| rs2820292  | 1   | 200,050,910 | NAV1         | C                     | 0.0195                                                                | Yes                           | Yes                           |                                                         |
| rs17724992 | 19  | 18,315,825  | PGPEP1       | A                     | 0.0194                                                                | Yes                           | Yes                           |                                                         |
| rs1000940  | 17  | 5,223,976   | RABEP1       | G                     | 0.0192                                                                | Yes                           | Yes                           |                                                         |
| rs2033732  | 8   | 85,242,264  | RALYL        | C                     | 0.0192                                                                | Yes                           | Yes                           |                                                         |
| rs9925964  | 16  | 31,037,396  | KAT8         | A                     | 0.0192                                                                | No                            | No                            | Linkage disequilibrium                                  |
| rs9641123  | 7   | 93,035,668  | CALCR        | C                     | 0.0191                                                                | No                            | Yes                           | Identified in secondary meta-analyses only              |
| rs2033529  | 6   | 40,456,631  | TDRG1        | G                     | 0.0190                                                                | No                            | Yes                           | Not included in Tyrrell et al's GRS because unavailable |
| rs1928295  | 9   | 119,418,304 | TLR4         | T                     | 0.0188                                                                | Yes                           | Yes                           |                                                         |
| rs3849570  | 3   | 81,874,802  | GBE1         | A                     | 0.0188                                                                | Yes                           | Yes                           |                                                         |
| rs6091540  | 20  | 50,521,269  | ZFP64        | C                     | 0.0188                                                                | No                            | Yes                           | Identified in secondary meta-analyses only              |
| rs9400239  | 6   | 109,084,356 | FOXO3        | C                     | 0.0188                                                                | Yes                           | Yes                           |                                                         |
| rs9374842  | 6   | 120,227,364 | LOC285762    | T                     | 0.0187                                                                | No                            | Yes                           | Identified in secondary meta-analyses only              |
| rs6804842  | 3   | 25,081,441  | RARB         | G                     | 0.0185                                                                | Yes                           | Yes                           |                                                         |
| rs12940622 | 17  | 76,230,166  | RPTOR        | G                     | 0.0182                                                                | Yes                           | Yes                           |                                                         |
| rs29941    | 19  | 39,001,372  | KCTD15       | G                     | 0.0182                                                                | Yes                           | Yes                           |                                                         |
| rs7164727  | 15  | 70,881,044  | LOC100287559 | T                     | 0.0180                                                                | No                            | Yes                           | Identified in secondary meta-analyses only              |
| rs4740619  | 9   | 15,624,326  | C9orf93      | T                     | 0.0179                                                                | Yes                           | Yes                           |                                                         |
| rs1528435  | 2   | 181,259,207 | UBE2E3       | T                     | 0.0178                                                                | Yes                           | Yes                           |                                                         |

| SNP        | Chr | Position    | Gene      | BMI-increasing allele | Effect size ( $\beta$ coefficient per effect allele, SD units of BMI) | Included in 69-SNP risk score | Included in 91-SNP risk score | Reason for exclusion <sup>1,2</sup>        |
|------------|-----|-------------|-----------|-----------------------|-----------------------------------------------------------------------|-------------------------------|-------------------------------|--------------------------------------------|
| rs11583200 | 1   | 50,332,407  | ELAVL4    | C                     | 0.0177                                                                | Yes                           | Yes                           |                                            |
| rs3736485  | 15  | 49,535,902  | DMXL2     | A                     | 0.0176                                                                | Yes                           | Yes                           |                                            |
| rs1441264  | 13  | 78,478,920  | MIR548A2  | A                     | 0.0175                                                                | No                            | Yes                           | Identified in secondary meta-analyses only |
| rs10733682 | 9   | 128,500,735 | LMX1B     | A                     | 0.0174                                                                | Yes                           | Yes                           |                                            |
| rs6477694  | 9   | 110,972,163 | EPB41L4B  | C                     | 0.0174                                                                | Yes                           | Yes                           |                                            |
| rs11688816 | 2   | 62,906,552  | EHBP1     | G                     | 0.0172                                                                | Yes                           | Yes                           |                                            |
| rs9540493  | 13  | 65,103,705  | MIR548X2  | A                     | 0.0172                                                                | No                            | Yes                           | Identified in secondary meta-analyses only |
| rs2080454  | 16  | 47,620,091  | CBLN1     | C                     | 0.0168                                                                | No                            | Yes                           | Identified in secondary meta-analyses only |
| rs1808579  | 18  | 19,358,886  | C18orf8   | C                     | 0.0167                                                                | Yes                           | Yes                           |                                            |
| rs977747   | 1   | 47,457,264  | TAL1      | T                     | 0.0167                                                                | No                            | Yes                           | Identified in secondary meta-analyses only |
| rs6465468  | 7   | 95,007,450  | ASB4      | T                     | 0.0166                                                                | No                            | Yes                           | Identified in secondary meta-analyses only |
| rs2836754  | 21  | 39,213,610  | ETS2      | C                     | 0.0164                                                                | No                            | Yes                           | Identified in secondary meta-analyses only |
| rs7239883  | 18  | 38,401,669  | LOC284260 | G                     | 0.0164                                                                | No                            | Yes                           | Identified in secondary meta-analyses only |
| rs7715256  | 5   | 153,518,086 | GALNT10   | G                     | 0.0163                                                                | No                            | Yes                           | Identified in secondary meta-analyses only |
| rs4787491  | 16  | 29,922,838  | INO80E    | G                     | 0.0159                                                                | No                            | Yes                           | Identified in secondary meta-analyses only |
| rs492400   | 2   | 219,057,996 | USP37     | C                     | 0.0158                                                                | No                            | Yes                           | Identified in secondary meta-analyses only |
| rs2176040  | 2   | 226,801,046 | LOC646736 | A                     | 0.0141                                                                | No                            | Yes                           | Identified in secondary meta-analyses only |

Note: This table is derived from Locke et al (2015), with additional information from Tyrrell et al (2017).

**Supplementary Table 2. Results of sensitivity analyses using unweighted genetic risk scores**

|                                                                                                     | <i>69-SNP unweighted imputed GRS (n=332,127)</i> |                                                                 |               | <i>91-SNP unweighted imputed GRS (n=326,604)</i> |                                                                 |               |
|-----------------------------------------------------------------------------------------------------|--------------------------------------------------|-----------------------------------------------------------------|---------------|--------------------------------------------------|-----------------------------------------------------------------|---------------|
|                                                                                                     | Quintile of genetic risk                         | Mean BMI difference for unit increase in neighbourhood exposure | P-interaction | Quintile of genetic risk                         | Mean BMI difference for unit increase in neighbourhood exposure | P-interaction |
| <b>Fast-food proximity</b><br>(log (base 10) of distance (m) to nearest fast-food outlet)           | Q1                                               | -0.094 (-0.229, 0.042)                                          |               | Q1                                               | -0.103 (-0.237, 0.030)                                          |               |
|                                                                                                     | Q2                                               | -0.123 (-0.250, 0.004)                                          |               | Q2                                               | -0.130 (-0.254, -0.005)                                         |               |
|                                                                                                     | Q3                                               | -0.143 (-0.268, -0.017)                                         | 0.064         | Q3                                               | -0.146 (-0.269, -0.023)                                         | 0.116         |
|                                                                                                     | Q4                                               | -0.162 (-0.289, -0.034)                                         |               | Q4                                               | -0.161 (-0.286, -0.037)                                         |               |
|                                                                                                     | Q5                                               | -0.191 (-0.327, -0.055)                                         |               | Q5                                               | -0.186 (-0.319, -0.053)                                         |               |
| <b>Availability of PA facilities</b><br>(number of formal PA facilities within 1km of home address) | Q1                                               | -0.069 (-0.096, -0.042)                                         |               | Q1                                               | -0.069 (-0.096, -0.042)                                         |               |
|                                                                                                     | Q2                                               | -0.073 (-0.099, -0.047)                                         |               | Q2                                               | -0.073 (-0.099, -0.047)                                         |               |
|                                                                                                     | Q3                                               | -0.075 (-0.101, -0.050)                                         | 0.119         | Q3                                               | -0.076 (-0.102, -0.050)                                         | 0.110         |
|                                                                                                     | Q4                                               | -0.078 (-0.104, -0.052)                                         |               | Q4                                               | -0.078 (-0.104, -0.052)                                         |               |
|                                                                                                     | Q5                                               | -0.081 (-0.108, -0.054)                                         |               | Q5                                               | -0.082 (-0.109, -0.055)                                         |               |

**Supplementary Table 3. Results of sensitivity analyses using an expanded sample including observations from UK Biobank participants of non-White ethnicities**

| <i>91-SNP weighted imputed GRS (N=374,339)</i>                                                      |                          |                                                                 |               |
|-----------------------------------------------------------------------------------------------------|--------------------------|-----------------------------------------------------------------|---------------|
|                                                                                                     | Quintile of genetic risk | Mean BMI difference for unit increase in neighbourhood exposure | P-interaction |
| <b>Fast-food proximity</b><br>(log (base 10) of distance (m) to nearest fast-food outlet)           | Q1                       | -0.086 (-0.208, 0.036)                                          | 0.026         |
|                                                                                                     | Q2                       | -0.119 (-0.233, -0.005)                                         |               |
|                                                                                                     | Q3                       | -0.140 (-0.252, -0.028)                                         |               |
|                                                                                                     | Q4                       | -0.161 (-0.274, -0.047)                                         |               |
|                                                                                                     | Q5                       | -0.195 (-0.318, -0.073)                                         |               |
| <b>Availability of PA facilities</b><br>(number of formal PA facilities within 1km of home address) | Q1                       | -0.068 (-0.095, -0.041)                                         | 0.197         |
|                                                                                                     | Q2                       | -0.071 (-0.097, -0.046)                                         |               |
|                                                                                                     | Q3                       | -0.072 (-0.098, -0.046)                                         |               |
|                                                                                                     | Q4                       | -0.074 (-0.100, -0.048)                                         |               |
|                                                                                                     | Q5                       | -0.077 (-0.104, -0.050)                                         |               |

**REFERENCES**

1. Tyrrell J, Wood AR, Ames RM, et al. Gene–obesogenic environment interactions in the UK Biobank study. *Int J Epidemiol.* 2017:dyw337. doi:10.1093/ije/dyw337.
2. Locke AE, Kahali B, Berndt SI, et al. Genetic studies of body mass index yield new insights for obesity biology. *Nature.* 2015;518(7538):197-206. doi:10.1038/nature14177.
